# Supplementary material for: Achieved negative differential resistance behavior of Si/B-substituted into a C6 chain sandwiched between capped carbon nanotube junctions
Source: Royal Society of Chemistry journal article supplement (doi:10.1039/d1ra08810f), 2022-01-01
Supplement: d1ra08810f1.pdf [file d1ra08810f1.pdf]

Supporting information for:

# Negative differential resistance behavior of Si/B-substituted into a C<sub>6</sub> chain sandwiched between capped carbon nanotube junctions

Najmeh Janatipour<sup>1</sup>, Zabiollah Mahdavifar<sup>\*1</sup>, Siamak Noorizadeh<sup>1</sup>, Georg Schreckenbach<sup>2</sup>

<sup>1</sup>Department of Chemistry, Faculty of Science, Shahid Chamran University of Ahvaz, Ahvaz, Iran

<sup>2</sup>Department of Chemistry, University of Manitoba, Winnipeg, Manitoba, R3T 2N2, Canada

---

To whom correspondence should be addressed

Fax: ++98-611-3331042

E-mail: [z\\_mahdavifar@scu.ac.ir](mailto:z_mahdavifar@scu.ac.ir) (Pr. Zabiollah Mahdavifar)

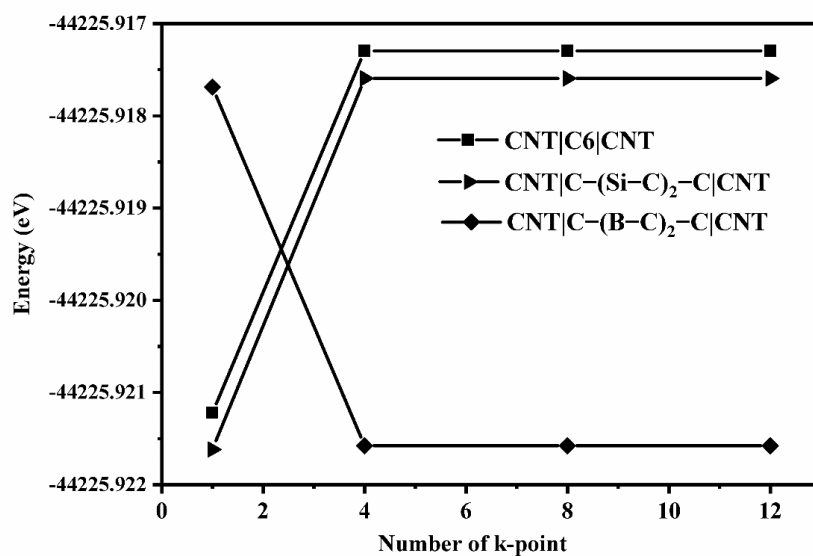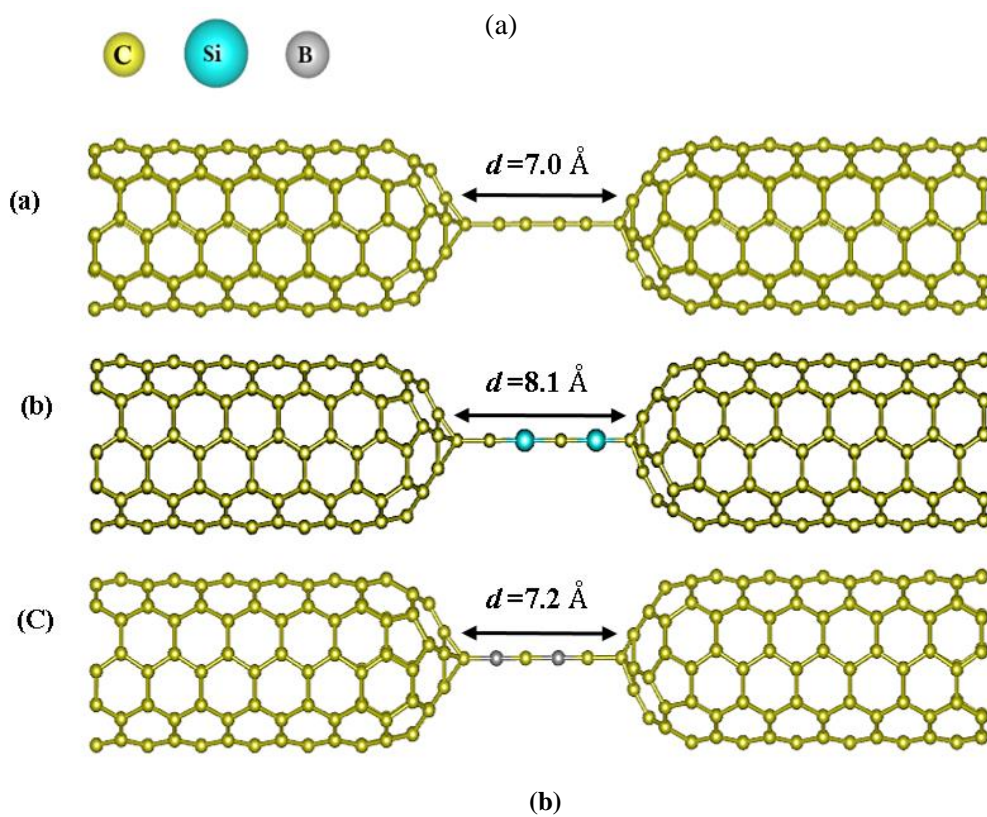

**Fig. S1:** (a) Energy (eV) vs. number of k-points for CNT|C6|CNT, CNT|C-(Si-C)<sub>2</sub>-C|CNT and CNT|C-(B-C)<sub>2</sub>-C|CNT molecular devices, (b) (b) Initial geometries of (a) C<sub>6</sub>, (b) C-(Si-C)<sub>2</sub>-C and (c) C-(B-C)<sub>2</sub>-C junctions with CNTs electrodes.

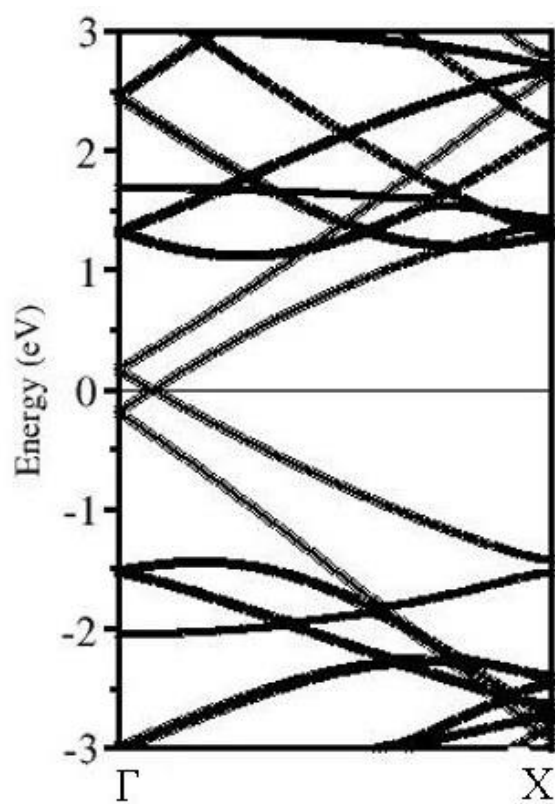

**Fig. S2:** (a) Band structure of CNT electrodes (including five nanotube lead layers). The Fermi level is set to zero. The solid line represents the Fermi level.

### CNT|C6|CNT

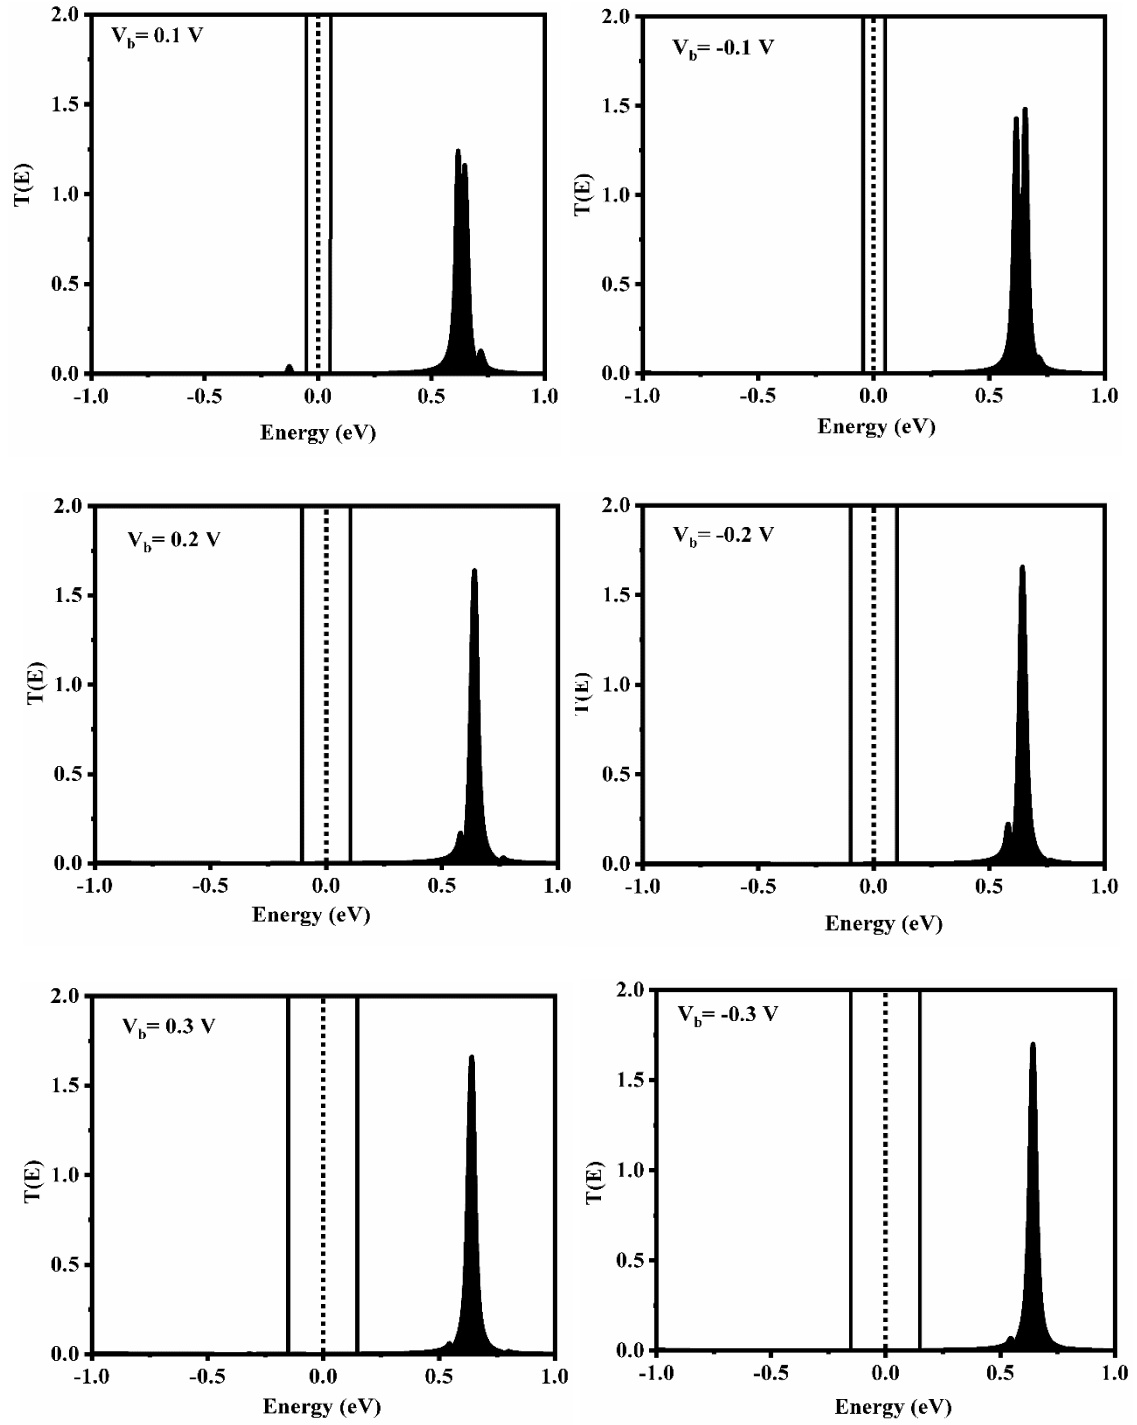

**Fig. S3:** Bias-dependent transmission spectra of (a) CNT|C<sub>6</sub>|CNT, (b) CNT|C-(Si-C)<sub>2</sub>-C|CNT, and (c) CNT|C-(B-C)<sub>2</sub>-C|CNT molecular devices. The Fermi level is set to zero. The dotted lines represent the Fermi level. The energy regions between the two solid lines show the bias window.

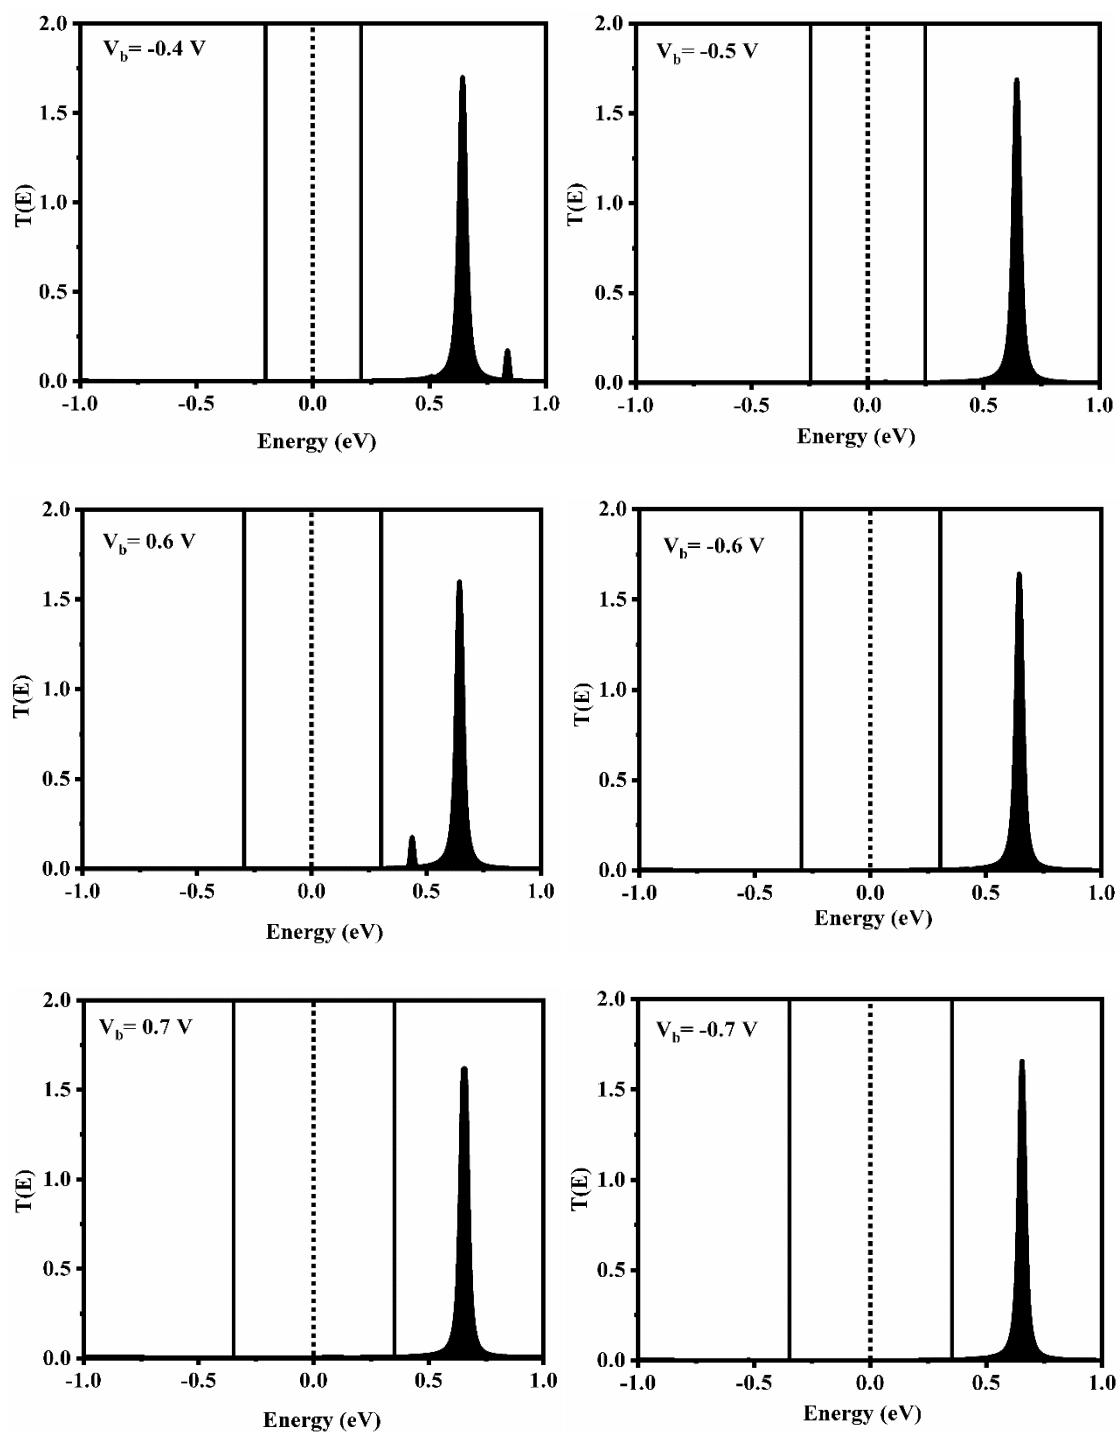

**Fig. S3:** continued

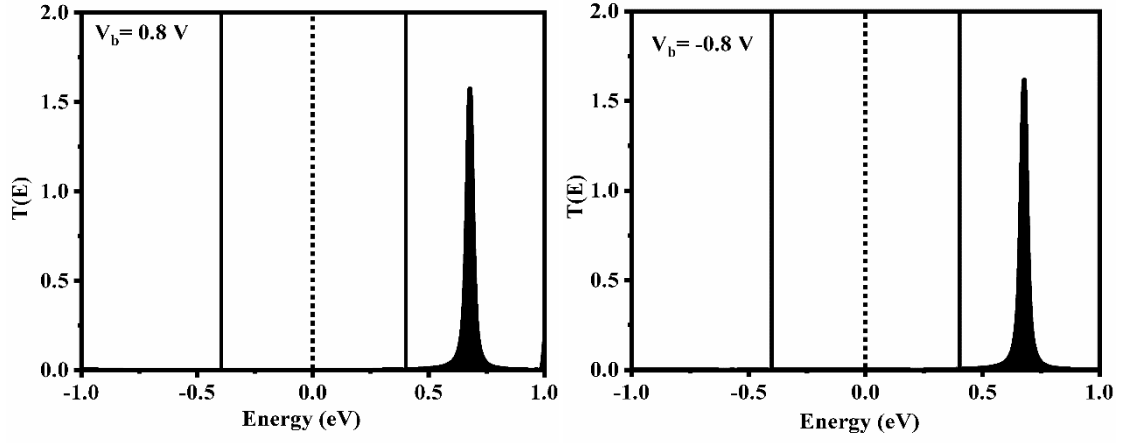

(a) CNT|C-(Si-C)<sub>2</sub>-C|CNT

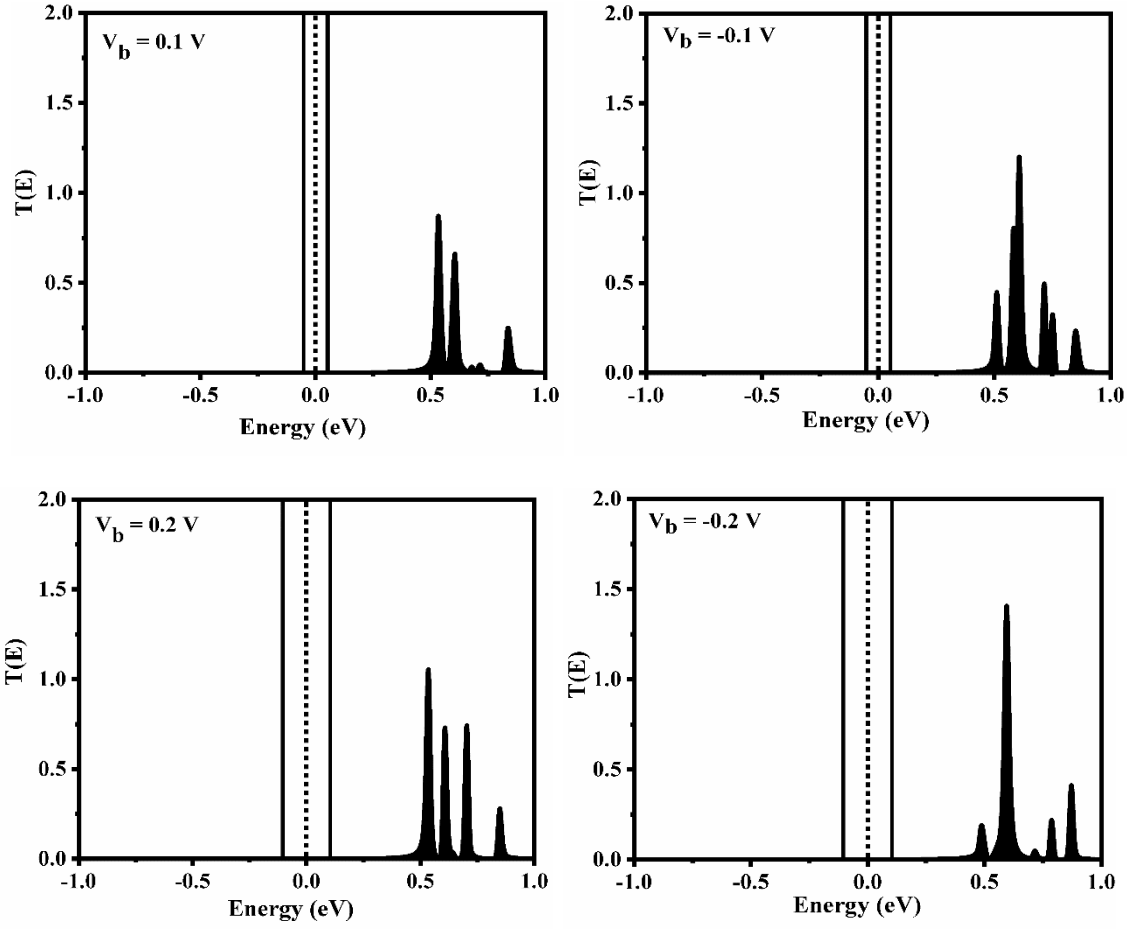

Fig S3: continued

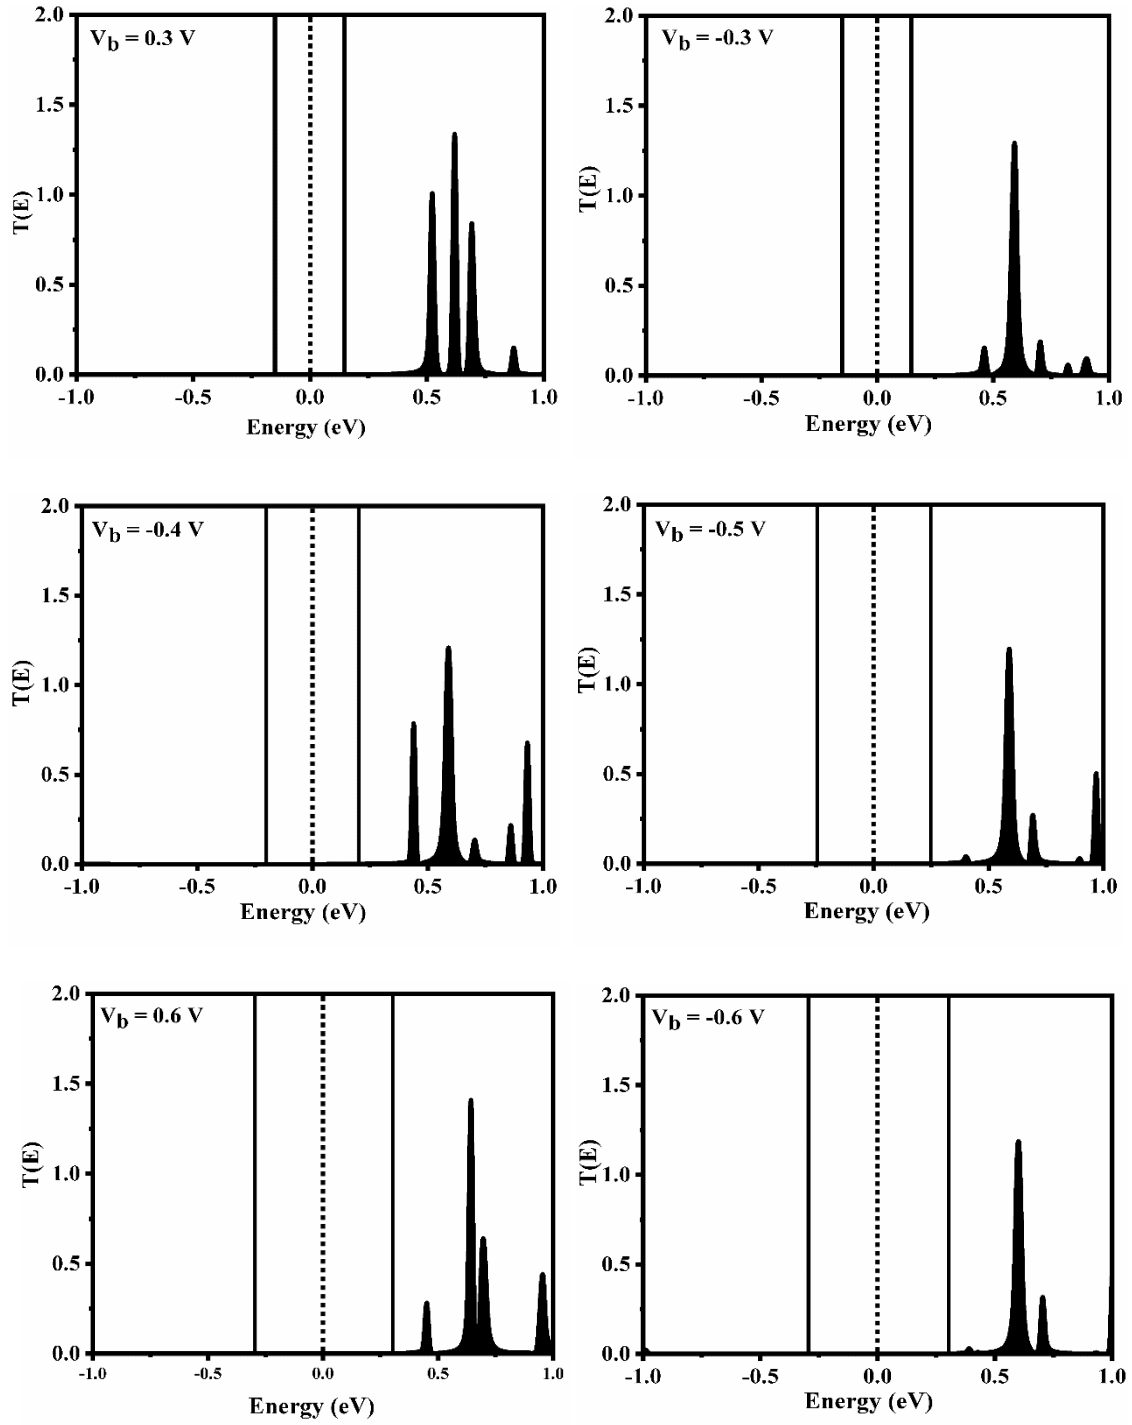

Fig S3: continued

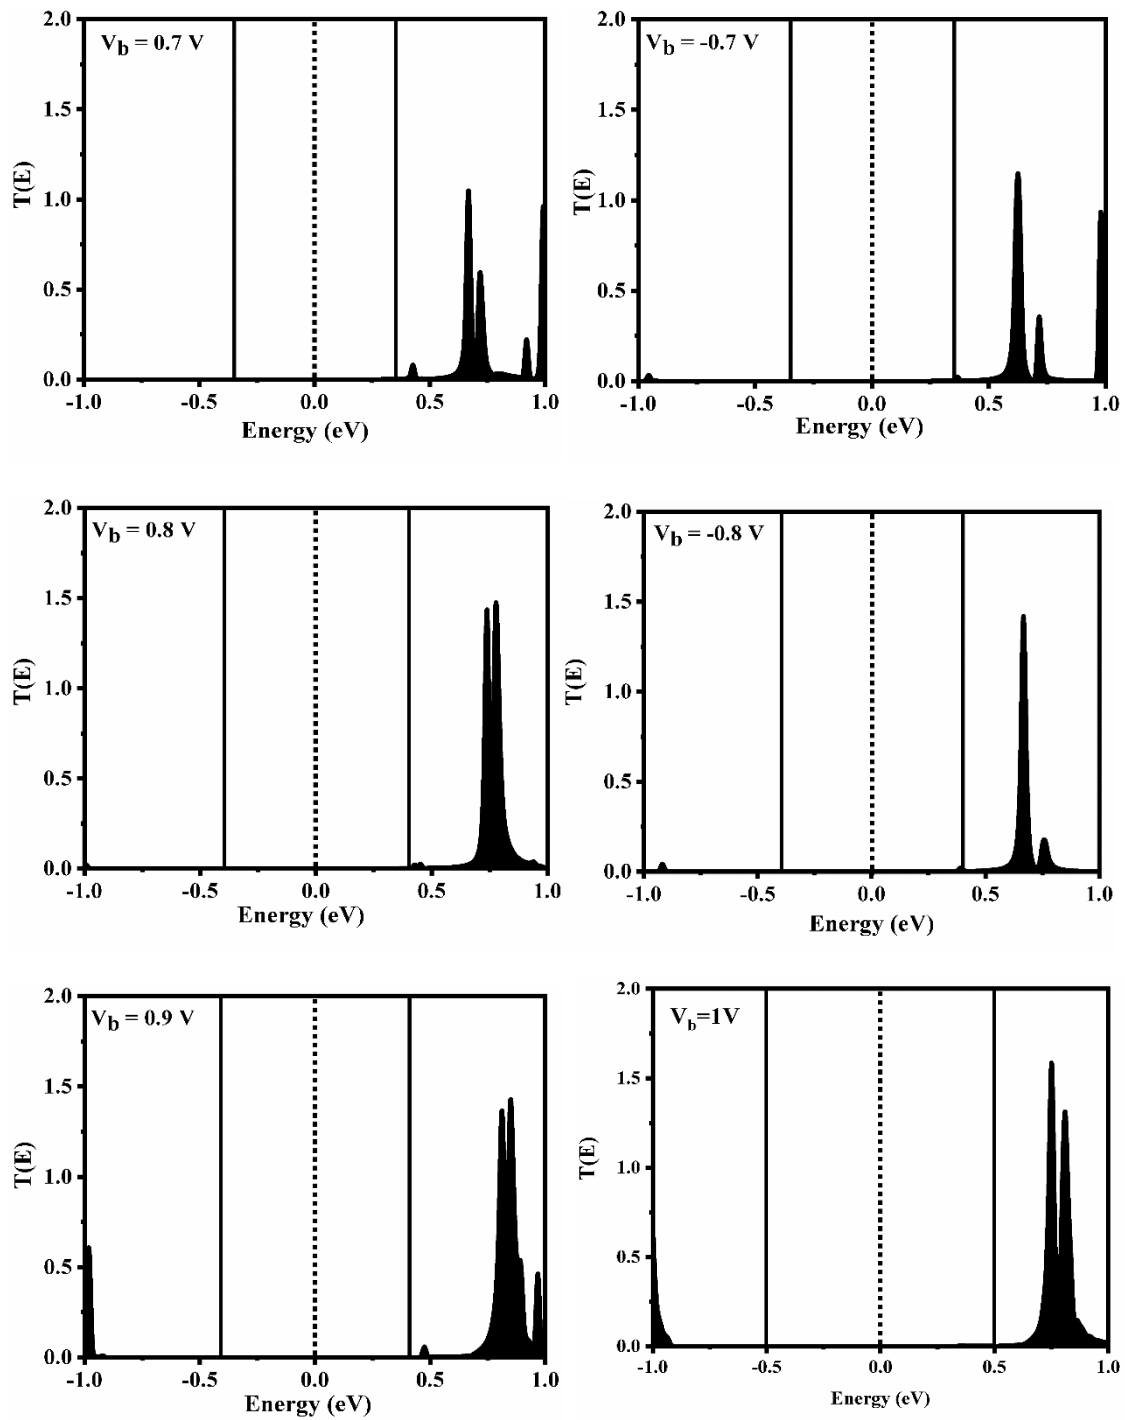

**Fig S3:** continue.



(b) CNT|C-(B-C)<sub>2</sub>-C|CNT

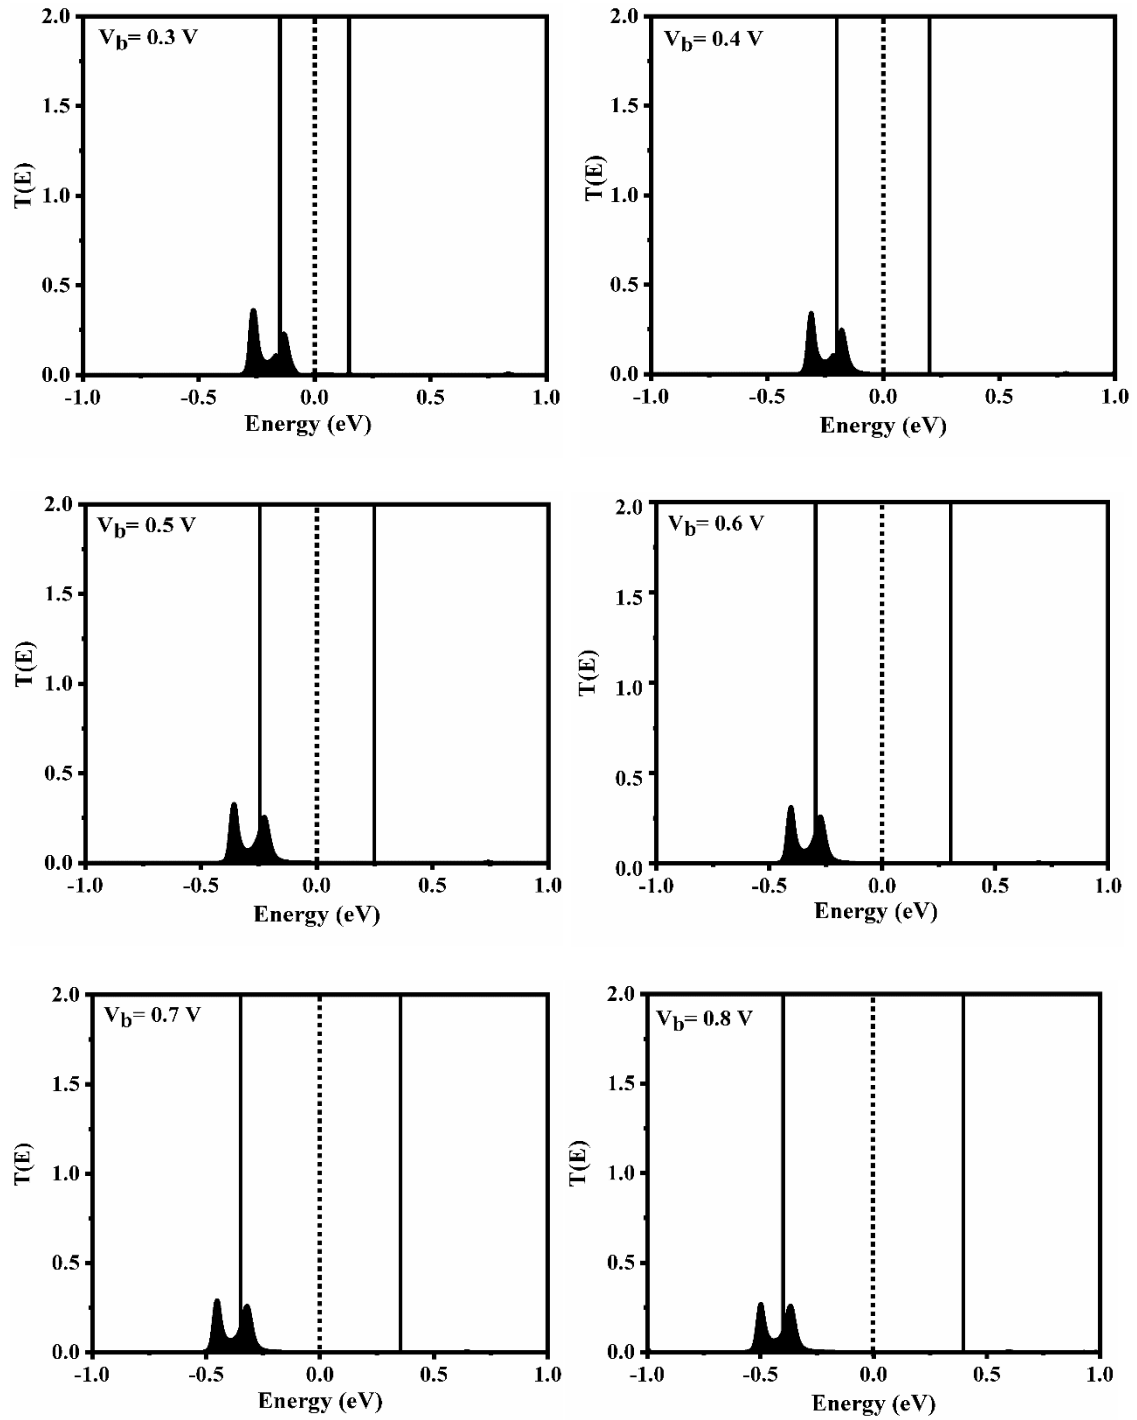

Fig S3: continued

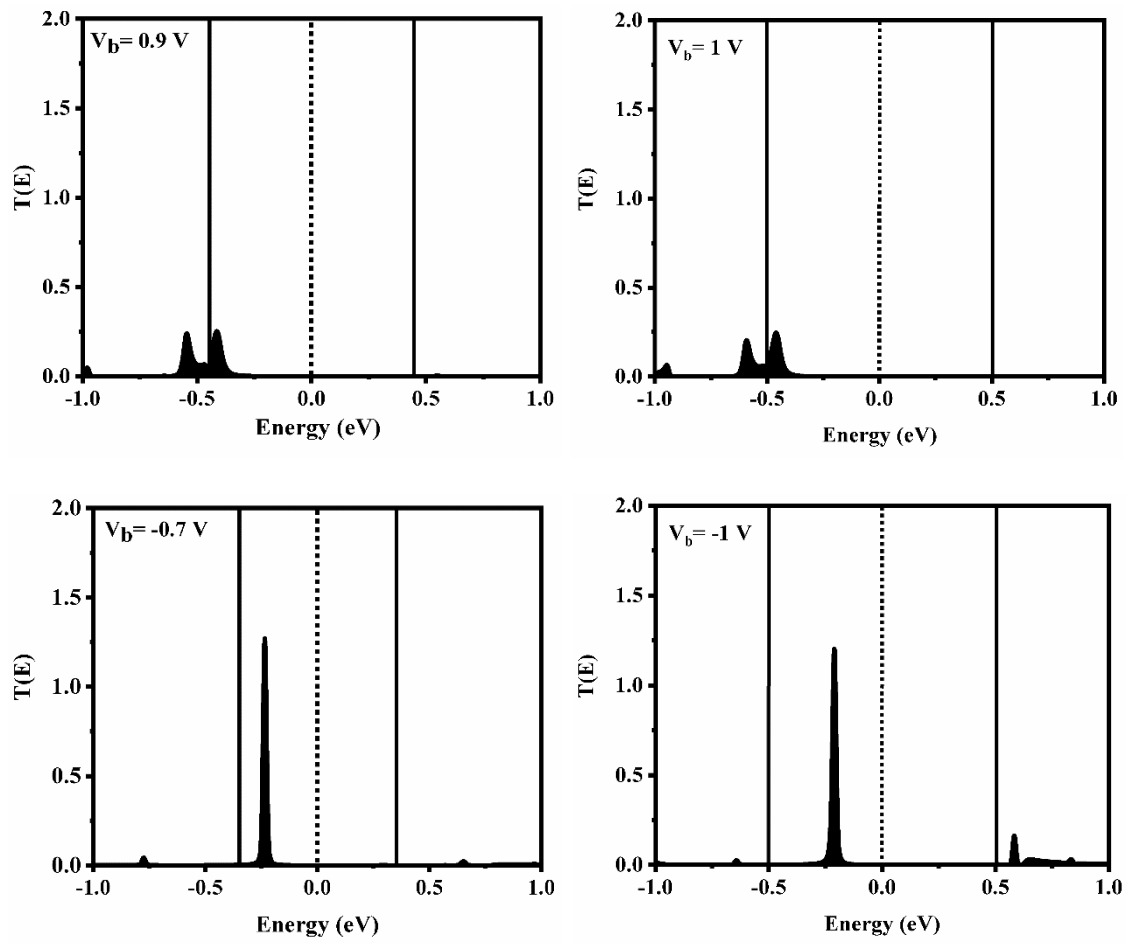

**Fig S3:** continued
